# Supplementary material for: MicroRNA as Possible Mediators of the Synergistic Effect of Celecoxib and Glucosamine Sulfate in Human Osteoarthritic Chondrocyte Exposed to IL-1β
Source: MDPI journal article supplement (doi:10.3390/ijms241914994), 2023-10-08
Supplement: s1 [file s1]

# MicroRNA as Possible Mediators of the Synergistic Effect of Celecoxib and Glucosamine Sulfate in Human Osteoarthritic Chondrocyte Exposed to IL-1 $\beta$

## Supplementary material

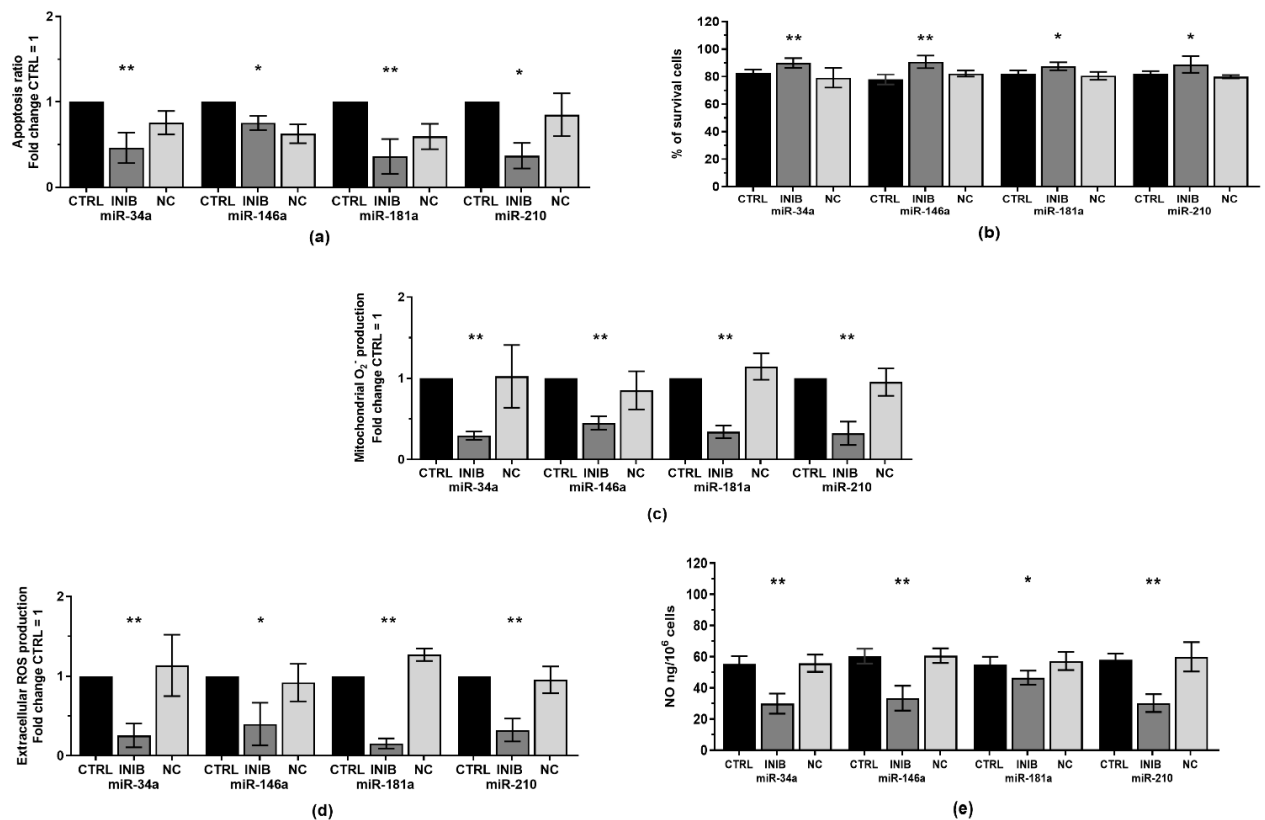

**Figure S1. Efficacy of miRNA silencing on apoptosis, viability, and redox balance.** Chondrocytes were evaluated at control (CTRL) condition, after 24 h of transient transfection with miR-34a, miR-146a, miR-181a, and miR-210 inhibitors (50 nM) or NC (5 nM). **(a,c,d)** Apoptosis detection and reactive oxygen species (ROS) production by flow cytometry. The results were expressed as fold change of the value of interest respect to CTRL, reported equal to 1. **(b)** Viability by MTT assay **(e)** Nitric oxide (NO) release by Griess method. Data were represented as mean  $\pm$  standard deviation. \* $p$  < 0.05, \*\* $p$  < 0.01 versus CTRL or NC.

**Table S1.** List of primers for quantitative real time PCR.

| <b>Target Genes</b> | <b>Cat. No. (Qiagen)</b> |
|---------------------|--------------------------|
| <i>BCL2</i>         | QT00000721               |
| <i>NRF2</i>         | QT00027384               |
| <i>miR-34a</i>      | MS00003318               |
| <i>miR-140</i>      | MS00003319               |
| <i>miR-146a</i>     | MS00003535               |
| <i>miR-155</i>      | MS00008778               |
| <i>miR-181a</i>     | MS00006692               |
| <i>miR-210</i>      | MS00006782               |
| <i>miR-375</i>      | MS00003741               |
| <i>miR-let7e</i>    | MS00031801               |
| <i>ACTB</i>         | QT00095431               |
| <i>SNORD-25</i>     | MS00014007               |

Abbreviations: BCL2 = B-cell lymphoma 2, NRF2 = nuclear factor erythroid 2 like 2, miRNA = microRNAs, ACTB = Actin Beta, SNORD-25 = Small Nucleolar RNA, C/D Box 25.
